# Supplementary material
Source: HighWire-hosted journal article supplement (https://bmjopenquality.bmj.com/highwire/filestream/146660/field_highwire_adjunct_files/0/bmjoq-2023-002372supp001_data_supplement.pdf)
Supplement: bmjoq-2023-002372supp001_data_supplement.pdf [file bmjoq-2023-002372supp001_data_supplement.pdf]

| Sr. no. | QI Week                                                                | PDSA (Idea)                                                                                                                                                           | STUDY                                                                                                   |                                                                                                                                                         | ACT                                                                                                                                                                                                                                                                                                |
|---------|------------------------------------------------------------------------|-----------------------------------------------------------------------------------------------------------------------------------------------------------------------|---------------------------------------------------------------------------------------------------------|---------------------------------------------------------------------------------------------------------------------------------------------------------|----------------------------------------------------------------------------------------------------------------------------------------------------------------------------------------------------------------------------------------------------------------------------------------------------|
|         |                                                                        | (Idea with Duration)                                                                                                                                                  | Merits                                                                                                  | Limitations                                                                                                                                             | Outcome<br>(Discussed in weekly Team Meeting)                                                                                                                                                                                                                                                      |
| 1       | 1 <sup>st</sup>                                                        | Baseline                                                                                                                                                              |                                                                                                         |                                                                                                                                                         | Plan to try broader strips of Micropore™ on the butterfly flap                                                                                                                                                                                                                                     |
| 2       | 2 <sup>nd</sup>                                                        | Broader strips of Micropore™ on the butterfly flap<br><br>(4 days)                                                                                                    | Better fixation than narrower strips                                                                    | Hub and wings did not get immobilised together                                                                                                          | Idea of broader strips of Micropore™ on the butterfly flap - ABANDONED<br><br>Plan to try Fixomull™ to strap the limb with the splint/limb                                                                                                                                                         |
| 3       | 2 <sup>nd</sup>                                                        | Strips of Fixomull™ to strap the limb with the splint/limb<br><br>(3 days)                                                                                            | Better fixation, lesser skin peeling at the time of removal                                             | Hub and wings did not get immobilised together                                                                                                          | Idea of using Fixomull™ to strap the limb with the splint/limb – ABANDONED<br><br>Plan to try Tegaderm™ flaps on wings and hub                                                                                                                                                                     |
| 4       | 3 <sup>rd</sup>                                                        | Tegaderm™ (sterile transparent dressing) flaps on wings and hub<br><br>(3 days)                                                                                       | Completely transparent seal, easier to monitor cannula complications<br><br>Better anchoring of cannula | Difficult to apply - material folds on itself - lot of wastage of material                                                                              | Tegaderm™ flaps on wings and hub proved difficult to be applied, material wastage was a concern – idea ADAPTED<br><br>Fixomull™ was a better choice to be used in overlapping flaps to anchor the cannula wings.                                                                                   |
| 5       | 3 <sup>rd</sup> 4 <sup>th</sup> ,<br>5 <sup>th</sup> , 6 <sup>th</sup> | Fixomull™ flaps on wings and hub<br><br>(Tried for 1 week, successful, continued till the end)                                                                        | Better anchoring of cannula, best by far                                                                |                                                                                                                                                         | Fixomull™ flaps were a success – idea ADOPTED – continued for the remaining weeks<br><br>Fixomull™ flaps continued for the remaining weeks<br><br>Plan to add a compulsory 10cm, 3-way extension with the cannula and fixation of the same with the splint/limb<br><br>End of 5 <sup>th</sup> week |
| 6       | 5 <sup>th</sup> , 6 <sup>th</sup>                                      | Compulsory use of a 10cm 3-way extension with the cannula and fixation of the same with the splint/limb<br><br>(Tried for 1 week, successful, continued till the end) | No movement at the point of insertion due to movement of the infusion lines                             |                                                                                                                                                         | Fixomull™ flaps continued for the remaining weeks<br><br>Idea of adding a compulsory 10cm, 3-way extension with the cannula and fixation of the same with the splint/limb – ADOPTED<br><br>Plan to try fixation without splints                                                                    |
| 7       | 6 <sup>th</sup>                                                        | Fixation without a splint<br><br>(Tried for 1 week - Unsuccessful<br><br>Discontinued after 1 week)                                                                   | More comfortable for the baby, reduction of weight on the limb                                          | More movement of the limb allowed causing more frequent dislodgement of cannula<br><br>Loss of area on which the 10cm 3-way extension could be anchored | Splints did not significantly change the cannula-longevity but having a splint gave additional surface area to anchor the 10cm, 3-way extension line and prevented unnecessary application of adhesive tapes to the neonate's delicate skin.<br><br>Hence omission of splints – ABANDONED          |
